# Supplementary material for: Maternal diabetes and childhood cancer risks in offspring: two population-based studies
Source: PubMed Central journal article supplement (PMC9643384; doi:10.1038/s41416-022-01961-w), 2022-09-10
Supplement: 41416_2022_1961_MOESM1_ESM.pdf [file 41416_2022_1961_MOESM1_ESM.pdf]

**Supplemental Table 1.** Demographic characteristics of study participants in Denmark, by case control status, 1977-2013 (n=166,904)

|                                                     | Cases<br>(N = 6,420)<br>N (%) | Controls<br>(N = 160,484)<br>N (%) |
|-----------------------------------------------------|-------------------------------|------------------------------------|
| <b>Mother's diabetes type</b>                       |                               |                                    |
| Type 1 diabetes                                     | 29 (0.5)                      | 544 (0.3)                          |
| Type 2 diabetes                                     | 15 (0.2)                      | 229 (0.1)                          |
| GDM                                                 | 40 (0.6)                      | 1014 (0.6)                         |
| <b>Mother pre-pregnancy BMI</b>                     |                               |                                    |
| Mean (SD)                                           | 24.4 (5.5)                    | 24.1 (4.8)                         |
| 18.4 or less                                        | 34 (4.2)                      | 821 (4.1)                          |
| 18.5-25                                             | 497 (61.1)                    | 12924 (64.4)                       |
| 25-30                                               | 179 (22.0)                    | 4043 (20.1)                        |
| 30 +                                                | 103 (12.7)                    | 2279 (11.4)                        |
| <b>Maternal age</b>                                 |                               |                                    |
| Mean (SD)                                           | 28.4 (5.0)                    | 28.3 (5.0)                         |
| =<24                                                | 1423 (22.2)                   | 36923 (23.0)                       |
| 25-29                                               | 2472 (38.5)                   | 60759 (37.9)                       |
| 30-34                                               | 1744 (27.2)                   | 44546 (27.8)                       |
| 35-39                                               | 669 (10.4)                    | 15695 (9.8)                        |
| 40+                                                 | 112 (1.7)                     | 2561 (1.6)                         |
| <b>Paternal age</b>                                 |                               |                                    |
| Mean (SD)                                           | 31.2 (5.8)                    | 31.1 (5.8)                         |
| =<24                                                | 661 (10.4)                    | 17979 (11.3)                       |
| 25-29                                               | 2047 (32.1)                   | 50022 (31.3)                       |
| 30-34                                               | 2050 (32.1)                   | 52045 (32.6)                       |
| 35-39                                               | 1096 (17.2)                   | 26766 (16.8)                       |
| 40+                                                 | 526 (8.2)                     | 12842 (8.0)                        |
| <b>Family SES</b>                                   |                               |                                    |
| Academics and high level self-employed              | 621 (13.3)                    | 15176 (13.0)                       |
| Middle-long education                               | 807 (17.3)                    | 19178 (16.4)                       |
| Shorter education                                   | 879 (18.8)                    | 22312 (19.0)                       |
| Skilled worker                                      | 1512 (32.4)                   | 38330 (32.7)                       |
| Unskilled worker                                    | 846 (18.1)                    | 22187 (18.9)                       |
| <b>Birth order</b>                                  |                               |                                    |
| 1                                                   | 2827 (44.0)                   | 68852 (42.9)                       |
| 2                                                   | 2400 (37.4)                   | 60938 (38.0)                       |
| 3 or more                                           | 1193 (18.6)                   | 30694 (19.1)                       |
| <b>Maternal smoking at the first prenatal visit</b> |                               |                                    |
|                                                     | 818 (23.9)                    | 20753 (24.2)                       |

|                           |                |                |
|---------------------------|----------------|----------------|
| Child's birthweight (g)   |                |                |
| Mean (SD)                 | 3466.5 (607.9) | 3437.8 (585.8) |
| Extremely low (<1000g)    | 48 (0.8)       | 944 (0.6)      |
| Low (1000-2500g)          | 274 (4.3)      | 6947 (4.3)     |
| Medium (2500g-4000g)      | 4846 (75.9)    | 125336 (78.4)  |
| High (>4000g)             | 1219 (19.1)    | 26606 (16.6)   |
| Maternal birthplace       |                |                |
| Denmark                   | 5853 (91.3)    | 146777 (91.6)  |
| Other Europe              | 217 (3.4)      | 5523 (3.4)     |
| Other                     | 338 (5.3)      | 7893 (4.9)     |
| Urban or rural birthplace |                |                |
| Urban                     | 2114 (32.9)    | 50981 (31.8)   |
| Small towns               | 1808 (28.2)    | 46632 (29.1)   |
| Rural                     | 2498 (38.9)    | 62871 (39.2)   |

---

SES: Socioeconomic status.

GDM: Gestational diabetes mellitus

**Supplemental Table 2.** Demographic characteristics of study participants, stratified by any type of maternal diabetes status, in Denmark, 1977-2013 (N = 166,904)

|                                                 | Children with<br>mothers who had<br>diabetes<br>(N = 1,948) | Children with<br>mothers who did<br>not have diabetes<br>(N = 164,956) |
|-------------------------------------------------|-------------------------------------------------------------|------------------------------------------------------------------------|
|                                                 | N (%)                                                       | N (%)                                                                  |
| Mother pre-pregnancy BMI                        | 28.6 (6.3)                                                  | 24.0 (4.7)                                                             |
| 18.4 or less                                    | 10 (1.6)                                                    | 845 (4.2)                                                              |
| 18.5-25                                         | 191 (29.8)                                                  | 13230 (65.4)                                                           |
| 25-30                                           | 202 (31.5)                                                  | 4020 (19.9)                                                            |
| 30 +                                            | 239 (37.2)                                                  | 2143 (10.6)                                                            |
| Child's sex                                     |                                                             |                                                                        |
| Male                                            | 1047 (53.7)                                                 | 90340 (54.8)                                                           |
| Female                                          | 901 (46.3)                                                  | 74616 (45.2)                                                           |
| Maternal age                                    |                                                             |                                                                        |
| Mean (SD)                                       | 30.9 (5.2)                                                  | 28.3 (4.9)                                                             |
| =<24                                            | 219 (11.2)                                                  | 38127 (23.1)                                                           |
| 25-29                                           | 618 (31.7)                                                  | 62613 (38.0)                                                           |
| 30-34                                           | 598 (30.7)                                                  | 45692 (27.7)                                                           |
| 35-39                                           | 397 (20.4)                                                  | 15967 (9.7)                                                            |
| 40+                                             | 116 (6.0)                                                   | 2557 (1.6)                                                             |
| Paternal age                                    |                                                             |                                                                        |
| Mean (SD)                                       | 33.5 (6.4)                                                  | 31.0 (5.8)                                                             |
| =<24                                            | 97 (5)                                                      | 18543 (11.3)                                                           |
| 25-29                                           | 458 (23.6)                                                  | 51611 (31.5)                                                           |
| 30-34                                           | 597 (30.8)                                                  | 53498 (32.6)                                                           |
| 35-39                                           | 477 (24.6)                                                  | 27385 (16.7)                                                           |
| 40+                                             | 311 (16)                                                    | 13057 (8)                                                              |
| Family SES                                      |                                                             |                                                                        |
| Academics and high level<br>self-employed       | 108 (9.1)                                                   | 15689 (13.0)                                                           |
| Middle-long education                           | 172 (14.5)                                                  | 19813 (16.4)                                                           |
| Shorter education                               | 232 (19.6)                                                  | 22959 (19.0)                                                           |
| Skilled worker                                  | 403 (34.0)                                                  | 39439 (32.7)                                                           |
| Unskilled worker                                | 270 (22.8)                                                  | 22763 (18.9)                                                           |
| Birth order                                     |                                                             |                                                                        |
| 1                                               | 669 (34.3)                                                  | 71010 (43.0)                                                           |
| 2                                               | 800 (41.1)                                                  | 62538 (37.9)                                                           |
| 3 or more                                       | 479 (24.6)                                                  | 31408 (19.0)                                                           |
| Maternal smoking at the first<br>prenatal visit | 303 (21.3)                                                  | 21268 (24.2)                                                           |
| Child's birthweight (g)                         |                                                             |                                                                        |

|                           |                |                |
|---------------------------|----------------|----------------|
| Mean (SD)                 | 3512.6 (684.7) | 3438.0 (585.4) |
| Extremely low (<1000g)    | 13 (0.7)       | 979 (0.6)      |
| Low (1000-2500g)          | 122 (6.3)      | 7099 (4.3)     |
| Medium (2500g-4000g)      | 1339 (68.9)    | 128843 (78.4)  |
| High (>4000g)             | 468 (24.1)     | 27357 (16.7)   |
| Maternal birthplace       |                |                |
| Denmark                   | 1661 (85.4)    | 150969 (91.7)  |
| Other Europe              | 62 (3.2)       | 5678 (3.4)     |
| Other                     | 222 (11.4)     | 8009 (4.9)     |
| Urban or rural birthplace |                |                |
| Urban                     | 688 (35.3)     | 52407 (31.8)   |
| Small towns               | 489 (25.1)     | 47951 (29.1)   |
| Rural                     | 771 (39.6)     | 64598 (39.2)   |

---

SES: Socioeconomic status

SD: Standard deviation

**Supplemental Table 3.** Sensitivity analysis examining the associations of type I diabetes and gestational diabetes with childhood cancer risks in Denmark (1991+, N = 89,232)

|                        | <b>Type I Diabetes</b>      |                                 |                                       |                                        |
|------------------------|-----------------------------|---------------------------------|---------------------------------------|----------------------------------------|
|                        | Total N                     | N (%) with type I diabetes      | *Odds Ratio (95% Confidence Interval) | **Odds Ratio (95% Confidence Interval) |
| Controls               | 85813                       | 289 (0.3)                       | Ref.                                  | Ref.                                   |
| All cancers            | 3419                        | 14 (0.4)                        | 1.21 (0.71, 2.08)                     | 1.21 (0.71, 2.08)                      |
| ALL                    | 682                         | 5 (0.7)                         | 2.14 (0.88, 5.19)                     | 2.14 (0.88, 5.20)                      |
| Central nervous system | 812                         | 7 (0.9)                         | 2.60 (1.22, 5.52)                     | 2.60 (1.22, 5.52)                      |
| Gliomas                | 341                         | 5 (1.5)                         | 4.51 (1.85, 11.0)                     | 4.51 (1.85, 11.0)                      |
|                        | <b>Gestational Diabetes</b> |                                 |                                       |                                        |
|                        | Total N                     | N (%) with gestational diabetes | *Odds Ratio (95% Confidence Interval) | **Odds Ratio (95% Confidence Interval) |
| Controls               | 85813                       | 908 (1.1)                       | Ref.                                  | Ref.                                   |
| All cancers            | 3419                        | 38 (1.1)                        | 1.05 (0.76, 1.46)                     | 1.05 (0.76, 1.46)                      |
| ALL                    | 682                         | 12 (1.8)                        | 1.49 (0.83, 2.65)                     | 1.49 (0.83, 2.65)                      |
| Central nervous system | 812                         | 8 (1.0)                         | 0.96 (0.47, 1.93)                     | 0.95 (0.47, 1.93)                      |
| Gliomas                | 341                         | < 5                             | -----                                 | -----                                  |

\*Adjusted for birth year and sex, maternal age, birth order

\*\* Additionally adjusted for maternal smoking

Ref.: Reference

ALL: Acute lymphoblastic leukemia

**Supplemental Table 4.** Sensitivity analysis examining the associations of pregestational diabetes and gestational diabetes with childhood cancer risks in Denmark (2003+, N = 20,880)

| <b>Pregestational Diabetes</b> |            |                                          |                                             |                                           |
|--------------------------------|------------|------------------------------------------|---------------------------------------------|-------------------------------------------|
|                                | Total<br>N | N (%) with<br>pregestational<br>diabetes | *Odds Ratio (95%<br>Confidence<br>Interval) | **Odds Ratio (95%<br>Confidence Interval) |
| Controls                       | 2006       | 149 (0.7)                                | Ref.                                        | Ref.                                      |
| All cancers                    | 813        | 7 (0.9)                                  | 1.17 (0.54, 2.50)                           | 1.13 (0.53, 2.42)                         |
| ALL                            | 201        | < 5                                      | ----                                        | ----                                      |
| Central nervous system         | 186        | < 5                                      | ----                                        | ----                                      |
| Gliomas                        | 64         | < 5                                      | ----                                        | ----                                      |
| <b>Gestational Diabetes</b>    |            |                                          |                                             |                                           |
|                                | Total<br>N | N (%) with<br>gestational<br>diabetes    | *Odds Ratio (95%<br>Confidence Interval)    | **Odds Ratio (95%<br>Confidence Interval) |
| Controls                       | 2006       | 465 (2.3)                                | Ref.                                        | Ref.                                      |
| All cancers                    | 813        | 21 (2.6)                                 | 1.12 (0.72, 1.75)                           | 1.05 (0.67, 1.64)                         |
| ALL                            | 201        | 8 (4.0)                                  | 1.70 (0.83, 3.49)                           | 1.74 (0.84, 3.61)                         |
| Central nervous system         | 186        | < 5                                      | ----                                        | ----                                      |
| Gliomas                        | 64         | < 5                                      | ----                                        | ----                                      |

\*Adjusted for birth year and sex, maternal age, birth order

\*\* Additionally adjusted for pre-pregnancy BMI

Ref.: Reference

ALL: Acute lymphoblastic leukemia

Note: Due to limited sample size, we were not able to examine the change in the estimates with and without adjustment of pre-pregnancy BMI for the association between maternal type I diabetes and any subtype or all types of childhood cancer, so the results presented here combined all types of pregestational diabetes.

**Supplemental Table 5.** Demographic characteristics of cancer cases and controls in Taiwan, birth years 2004-2014

|                                   | Cancer Cases<br>N=2,160<br>N (%) | Non-cases<br>N=2,076,877<br>N (%) |
|-----------------------------------|----------------------------------|-----------------------------------|
| <b>Maternal diabetes</b>          |                                  |                                   |
| Type I diabetes                   | < 3                              | 2372(0.1)                         |
| Type II diabetes                  | 64 (3.0)                         | 80947(3.9)                        |
| Gestational diabetes              | 211 (9.8)                        | 202881(9.8)                       |
| <b>Birth year</b>                 |                                  |                                   |
| 2004                              | 291 (13.5)                       | 199381 (9.6)                      |
| 2005                              | 297 (13.8)                       | 191774 (9.2)                      |
| 2006                              | 249 (11.5)                       | 190892 (9.2)                      |
| 2007                              | 252 (11.7)                       | 192909 (9.3)                      |
| 2008                              | 222 (10.1)                       | 187788 (9.03)                     |
| 2009                              | 230 (10.6)                       | 185401 (8.93)                     |
| 2010                              | 141 (6.5)                        | 151020 (7.3)                      |
| 2011                              | 155 (7.2)                        | 182461 (8.8)                      |
| 2012                              | 156 (7.2)                        | 205961 (9.9)                      |
| 2013                              | 92 (4.3)                         | 191559 (9.2)                      |
| 2014                              | 75 (3.5)                         | 197731 (9.5)                      |
| <b>Maternal age</b>               |                                  |                                   |
| Mean (SD)                         | 30.0 (4.8)                       | 30.2 (4.8)                        |
| <20                               | 41 (1.9)                         | 31044 (1.5)                       |
| 20-29                             | 956 (44.3)                       | 863624 (41.6)                     |
| 30-34                             | 804 (37.2)                       | 797993 (38.4)                     |
| 35-39                             | 291 (13.5)                       | 331300 (16.0)                     |
| 40+                               | 68 (3.2)                         | 52916 (2.6)                       |
| <b>Maternal history of cancer</b> |                                  |                                   |
| Yes                               | 43 (2.0)                         | 31809 (1.5)                       |
| <b>Paternal age</b>               |                                  |                                   |
| Mean (SD)                         | 33.1 (5.5)                       | 33.2 (5.3)                        |
| <20                               | 5 (0.2)                          | 3485 (0.2)                        |
| 20-29                             | 510 (23.6)                       | 454359 (21.9)                     |
| 30-34                             | 779 (36.1)                       | 760634 (36.6)                     |
| 35-39                             | 479 (22.2)                       | 511717 (24.6)                     |
| 40+                               | 242 (11.2)                       | 220401 (10.6)                     |
| Missing                           | 145 (6.7)                        | 126281 (6.1)                      |

|                                      |                |                |
|--------------------------------------|----------------|----------------|
| Paternal history of cancer           |                |                |
| Yes                                  | 34 (1.6)       | 22987(1.1)     |
| Family income (New Taiwan dollar)    |                |                |
| <26400                               | 554 (25.7)     | 498013 (24.0)  |
| 26400-45600                          | 542 (25.1)     | 497747 (24.0)  |
| 45600-70850                          | 488 (22.6)     | 500029 (24.1)  |
| ≥70850                               | 485 (22.5)     | 498801(24.0)   |
| Missing                              | 91 (4.2)       | 82287 (4.0)    |
| Urbanization level of inhabited area |                |                |
| High                                 | 1078 (50.0)    | 1102672 (53.1) |
| Middle                               | 876 (40.6)     | 781604 (37.6)  |
| Low                                  | 206 (9.5)      | 192601 (9.3)   |
| Mother's birthplace                  |                |                |
| Taiwan                               | 1302 (60.3)    | 1400491 (67.4) |
| Foreign born                         | 141 (6.5)      | 132170 (6.4)   |
| Missing                              | 717 (33.2)     | 544216 (26.2)  |
| Sex                                  |                |                |
| Male                                 | 1197 (55.4)    | 1079059 (52.0) |
| Female                               | 963 (44.6)     | 997718 (48.0)  |
| Missing                              | 0 (0.0)        | 100 (7.5)      |
| Birth weight (g)                     |                |                |
| Mean (SD)                            | 3070.6 (485.6) | 3078.1 (449.5) |
| <2500                                | 185 (8.6)      | 156525 (7.5)   |
| 2500-3999                            | 1926 (89.2)    | 1882670 (90.7) |
| ≥4000                                | 49 (2.3)       | 37682 (1.8)    |
| Gestational age (weeks)              |                |                |
| Mean (SD)                            | 38.1 (1.9)     | 38.3 (1.7)     |
| Very preterm (<33)                   | 45 (2.1)       | 23053 (1.1)    |
| Preterm (33-36)                      | 199 (9.2)      | 160438 (7.7)   |
| Term (≥37)                           | 1916 (88.7)    | 1893386 (91.2) |
| Size for gestational age             |                |                |
| Lowest 10%                           | 185 (8.6)      | 195988 (9.4)   |
| Middle 80%                           | 1785 (82.6)    | 1712398 (82.5) |
| Highest 10%                          | 190 (8.8)      | 168491 (8.1)   |
| Method of delivery                   |                |                |
| Vaginal                              | 1355 (62.7)    | 1331991 (64.1) |
| Cesarean section                     | 805 (37.3)     | 744886 (35.9)  |
| Multiple birth                       |                |                |



|              |             |                |
|--------------|-------------|----------------|
| Singleton    | 2087 (96.6) | 2015039 (97.0) |
| Twin or more | 73 (3.4)    | 61838 (3.0)    |
| Parity       |             |                |
| 1            | 832 (38.5)  | 807516 (38.9)  |
| 2            | 1010 (46.8) | 1044027 (50.3) |
| 3 or more    | 318 (14.7)  | 225334 (10.9)  |

---

SD: Standard deviation

**Supplemental Table 6.** Demographic characteristics and maternal diabetes in Taiwan (n= 2,079,037)

|                     | Cases (n=2,160)                                    |                                                         |                | Non-cases(n=2,076,877)                                 |                                                             |                    |
|---------------------|----------------------------------------------------|---------------------------------------------------------|----------------|--------------------------------------------------------|-------------------------------------------------------------|--------------------|
|                     | Children of mothers with maternal diabetes (n=276) | Children of mothers without maternal diabetes (n=1,867) | Missing (n=17) | Children of mothers with maternal diabetes (n=284,734) | Children of mothers without maternal diabetes (n=1,769,535) | Missing (n=22,608) |
|                     | N (%)                                              | N (%)                                                   |                | N (%)                                                  | N (%)                                                       |                    |
| <b>Birth year</b>   |                                                    |                                                         |                |                                                        |                                                             |                    |
| 2004                | 24(8.7)                                            | 264(14.1)                                               | <= 3           | 18885(6.6)                                             | 177494(10.0)                                                | 3002               |
| 2005                | 35(12.7)                                           | 258(13.8)                                               | 4              | 20156(7.1)                                             | 169233(9.6)                                                 | 2385               |
| 2006                | 32(11.6)                                           | 214(11.5)                                               | <= 3           | 21818(7.7)                                             | 166947(9.4)                                                 | 2127               |
| 2007                | 30(10.9)                                           | 219(11.7)                                               | <= 3           | 24163(8.5)                                             | 166520(9.4)                                                 | 2226               |
| 2008                | 30(10.9)                                           | 188(10.1)                                               | <= 3           | 24395(8.6)                                             | 161327(9.1)                                                 | 2066               |
| 2009                | 26(9.42)                                           | 204(10.9)                                               | <= 3           | 26365(9.3)                                             | 157109(8.9)                                                 | 1927               |
| 2010                | 16(5.8)                                            | 125(6.7)                                                | <= 3           | 22684(8.0)                                             | 126698(7.2)                                                 | 1638               |
| 2011                | 27(9.8)                                            | 128(6.9)                                                | <= 3           | 28542(10.0)                                            | 152215(8.6)                                                 | 1704               |
| 2012                | 22(8.0)                                            | 134(7.2)                                                | <= 3           | 32692(11.5)                                            | 171488(9.7)                                                 | 1781               |
| 2013                | 20(7.3)                                            | 72(3.9)                                                 | <= 3           | 31469(11.1)                                            | 158250(8.9)                                                 | 1840               |
| 2014                | 14(5.1)                                            | 61(3.3)                                                 | <= 3           | 33565(11.8)                                            | 162254(9.2)                                                 | 1912               |
| <b>Child's sex</b>  |                                                    |                                                         |                |                                                        |                                                             |                    |
| Male                | 146(52.9)                                          | 1047(56.1)                                              | 4              | 149565(52.5)                                           | 917656(51.9)                                                | 11838              |
| Female              | 130(47.1)                                          | 820(43.9)                                               | 13             | 135156(47.5)                                           | 851792(48.1)                                                | 10770              |
| missing             | <= 3                                               | <= 3                                                    | <= 3           | 13                                                     | 87                                                          | <= 3               |
| <b>Maternal age</b> |                                                    |                                                         |                |                                                        |                                                             |                    |
| Mean (SD)           | 31.3(4.6)                                          | 29.8(4.9)                                               | 17             | 31.5(4.6)                                              | 30.0(4.8)                                                   | 22608              |
| <20                 | <= 3                                               | 38(2.0)                                                 | <= 3           | 1728(0.6)                                              | 29202(1.7)                                                  | 114                |
| 20-29               | 94(34.1)                                           | 854(45.7)                                               | 8              | 89330(31.4)                                            | 761712(43.1)                                                | 12582              |
| 30-34               | 112(40.6)                                          | 683(36.6)                                               | 9              | 120620(42.4)                                           | 670635(37.9)                                                | 6738               |
| 35-39               | 55(19.9)                                           | 236(12.6)                                               | <= 3           | 61402(21.6)                                            | 267143(15.1)                                                | 2755               |
| 40+                 | 12(4.4)                                            | 56(3.0)                                                 | <= 3           | 11654(4.1)                                             | 40843(2.3)                                                  | 419                |

|                                      |               |               |      |               |               |       |
|--------------------------------------|---------------|---------------|------|---------------|---------------|-------|
| Paternal age                         |               |               |      |               |               |       |
| Mean (SD)                            | 34.1(5.0)     | 32.9(5.5)     | 17   | 34.1(5.2)     | 33.1(5.3)     | 22608 |
| <20                                  | <= 3          | 5(0.3)        | <= 3 | 182(0.1)      | 3298(0.2)     | 5     |
| 20-29                                | 44(16.8)      | 462(26.6)     | 4    | 47880(17.6)   | 403843(24.4)  | 2636  |
| 30-34                                | 93(35.5)      | 679(39.1)     | 9    | 105548(38.8)  | 648175(39.1)  | 6911  |
| 35-39                                | 85(32.4)      | 392(22.6)     |      | 81619(30.0)   | 423297(25.6)  | 6801  |
| 40+                                  | 40(15.3)      | 198(11.4)     | 4    | 36717(13.5)   | 177940(10.7)  | 5744  |
| Missing                              | 14            | 131           | <= 3 | 12788         | 112982        | 511   |
| Family income (New Taiwan dollar)    |               |               |      |               |               |       |
| <26400                               | 55(20.5)      | 488(27.4)     | 11   | 53648(19.4)   | 428844(25.3)  | 15521 |
| 26400-45600                          | 67(25.0)      | 471(26.4)     | 6    | 65789(23.8)   | 428133(25.3)  | 3825  |
| 45600-70850                          | 63(23.5)      | 423(23.7)     |      | 73012(26.4)   | 424827(25.1)  | 2190  |
| ≥70850                               | 83(31.0)      | 402(22.5)     | <= 3 | 84075(30.4)   | 413936(24.4)  | 790   |
| Missing                              | 8             | 83            | <= 3 | 8210          | 73795         | 282   |
| Urbanization level of inhabited area |               |               |      |               |               |       |
| High                                 | 150(54.4)     | 918(49.2)     | 10   | 164073(57.6)  | 926023(52.3)  | 12576 |
| Middle                               | 97(35.1)      | 772(41.4)     | 7    | 93242(32.8)   | 680369(38.5)  | 7993  |
| Low                                  | 29(10.5)      | 177(9.5)      | <= 3 | 27419(9.6)    | 163143(9.2)   | 2039  |
| Parity                               |               |               |      |               |               |       |
| 1                                    | 107(38.8)     | 716(38.4)     | 9    | 112315(39.5)  | 681598(38.5)  | 13603 |
| 2                                    | 130(47.1)     | 872(4.67)     | 8    | 145842(51.2)  | 890263(50.3)  | 7922  |
| 3 or more                            | 39(14.1)      | 279(14.9)     | <= 3 | 26577(9.3)    | 197674(11.2)  | 1083  |
| Maternal smoking (before birth)      |               |               |      |               |               |       |
| Yes                                  | <= 3          | 8(0.4)        | <= 3 | 2319(0.8)     | 11478(0.7)    | <= 3  |
| No                                   | 276(100.0)    | 1859(99.6)    | <= 3 | 282415(99.2)  | 1758057(99.4) | 437   |
| Missing                              | <= 3          | <= 3          | 17   | <= 3          | <= 3          | 22171 |
| Child's birthweight                  |               |               |      |               |               |       |
| Mean (SD)                            | 3128.7(468.6) | 3061.4(488.7) | 17   | 3116.3(466.6) | 3070.8(446.5) | 22608 |
| Extremely low (<1000g)               | 17(6.2)       | 11(0.6)       | <= 3 | 350(0.1)      | 4188(0.2)     | 36    |
| Low (1000-2500g)                     |               | 175(9.4)      | <= 3 | 22042(7.7)    | 143564(8.1)   | 1218  |

|                        |           |            |      |              |               |       |
|------------------------|-----------|------------|------|--------------|---------------|-------|
| Medium (2501g-4000g)   | 249(90.2) | 1650(88.4) | 17   | 254864(89.5) | 1596961(90.3) | 20869 |
| High (>4000g)          | 10(3.6)   | 31(1.7)    | <= 3 | 7478(2.6)    | 24822(1.4)    | 485   |
| Mother's diabetes type |           |            |      |              |               |       |
| Type 1 diabetes        | 65(23.6)  | -----      | <= 3 | 2372(0.8)    | -----         | <= 3  |
| Type 2 diabetes        |           | -----      | <= 3 | 80947(28.4)  | -----         | <= 3  |
| GDM                    | 211(76.5) | -----      | <= 3 | 202881(71.3) | -----         | <= 3  |

---

GDM: gestational diabetes mellitus

**Supplemental Table 7.** Sensitivity analysis examining the associations of type II diabetes and gestational diabetes with childhood cancer risks in Taiwan (2004-2014)

|                               | Total N | Type II Diabetes |                   |                             | Gestational Diabetes |                   |                             |
|-------------------------------|---------|------------------|-------------------|-----------------------------|----------------------|-------------------|-----------------------------|
|                               |         | N (%)            | Crude HR (95% CI) | *Adjusted Model HR (95% CI) | N (%)                | Crude HR (95% CI) | *Adjusted Model HR (95% CI) |
| Non-cases                     | 2076877 | 80947(3.9)       | Ref.              | Ref.                        | 202881(9.8)          | Ref.              | Ref.                        |
| All cancers                   | 2160    | 64(3.0)          | 0.82(0.64-1.05)   | 0.82(0.64-1.05)             | 211(9.8)             | 1.06(0.92-1.22)   | 1.06(0.92-1.22)             |
| ALL                           | 612     | 19(3.1)          | 0.88(0.56-1.38)   | 0.88(0.56-1.40)             | 64(10.5)             | 1.15(0.89-1.49)   | 1.16(0.89-1.51)             |
| AML                           | 155     | 4(2.6)           | -----             | -----                       | 13(8.4)              | 0.90(0.51-1.59)   | 0.92(0.52-1.63)             |
| NHL                           | 438     | 14(3.2)          | 0.93(0.54-1.58)   | 0.82(0.48-1.40)             | 39(8.9)              | 0.98(0.70-1.36)   | 0.91(0.65-1.26)             |
| Central nervous system tumors | 293     | 8(2.7)           | 0.77(0.38-1.55)   | 0.79(0.39-1.59)             | 35(12.0)             | 1.33(0.94-1.90)   | 1.38(0.96-1.96)             |
| Gliomas                       | 169     | 6(3.6)           | 1.03(0.45-2.32)   | 1.10(0.49-2.49)             | 22(13.0)             | 1.49(0.95-2.33)   | 1.59(1.01-2.50)             |
| Retinoblastoma                | 129     | <=3              | -----             | -----                       | 18(14.0)             | 1.52(0.92-2.50)   | 1.48(0.90-2.44)             |
| Medulloblastoma               | 69      | <=3              | -----             | -----                       | 6(8.7)               | 0.95(0.41-2.19)   | 0.96(0.41-2.22)             |
| Neuroblastoma                 | 226     | 9(4.0)           | 1.06(0.54-2.06)   | 1.00(0.51-1.96)             | 20(8.9)              | 0.92(0.58-1.44)   | 0.89(0.56-1.41)             |
| Hepatoblastoma                | 113     | 9(8.0)           | 2.18(1.10-4.30)   | 2.02(1.02-4.00)             | 14(12.4)             | 1.32(0.75-2.30)   | 1.26(0.72-2.20)             |
| Germ cell tumors              | 210     | 5(2.4)           | 0.66(0.27-1.61)   | 0.66(0.27-1.59)             | 14(6.7)              | 0.71(0.41-1.21)   | 0.70(0.41-1.21)             |

\* Adjusted for birth year and sex, maternal age, parity, maternal smoking.

Ref.: Reference

ALL: Acute lymphoblastic leukemia

AML: Acute myeloid leukemia

NHL: Non-Hodgkin's lymphoma
